# Supplementary material for: Polycations as Aptamer-Binding Modulators for Sensitive Fluorescence Anisotropy Assay of Aflatoxin B1
Source: Sensors (Basel). 2024 May 19;24(10):3230. doi: 10.3390/s24103230 (PMC11125339; doi:10.3390/s24103230)
Supplement: Supplementary file 1 [file sensors-24-03230-s001.zip › sensors-2953441-supplementary.pdf]

# Supplementary Materials

Article

## Polycations as aptamer-binding modulators for sensitive fluorescence anisotropy assay of aflatoxin B1

Alexey V. Samokhvalov<sup>1</sup>, Alena A. Mironova<sup>1</sup>, Sergei A. Eremin<sup>2</sup>, Anatoly V. Zherdev<sup>1</sup> and Boris B. Dzantiev<sup>1\*</sup>

<sup>1</sup> A.N. Bach Institute of Biochemistry, Research Center of Biotechnology, Russian Academy of Sciences, 119071, Moscow, Russia

<sup>2</sup> Faculty of Chemistry, M.V. Lomonosov Moscow State University, Moscow 119991, Russia

\* Correspondence: dzantiev@inbi.ras.r

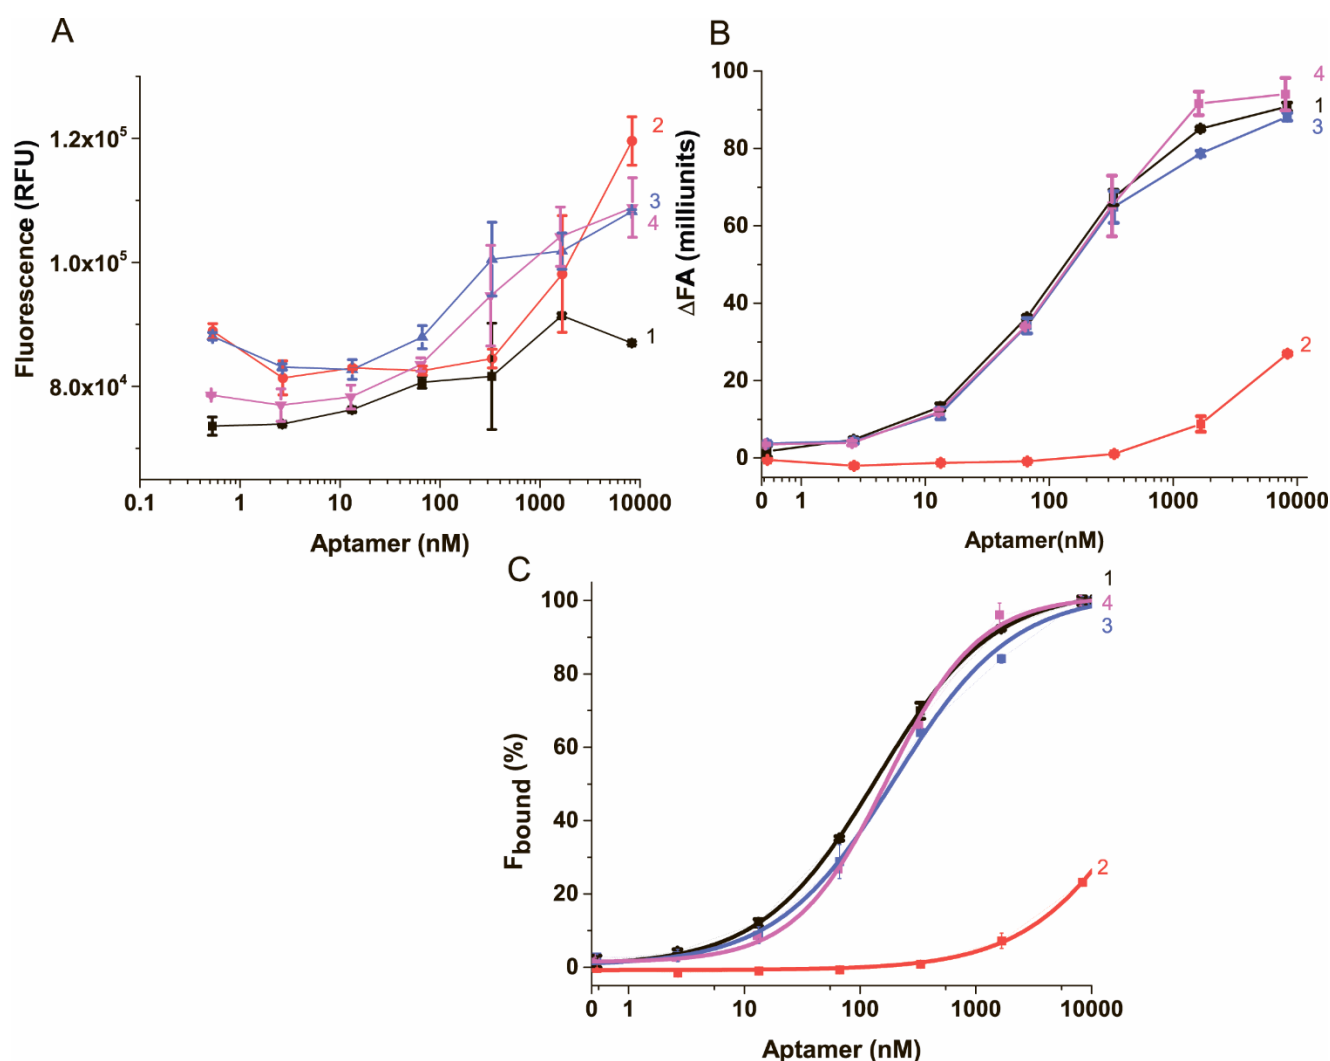

**Figure S1.** The dependencies of fluorescence (A), the change of fluorescence anisotropy (B), and the percentage of the bound fraction (C) of AFB<sub>1</sub>-EDF on the concentration of the untruncated stem-loop aptamer in different buffers: 1 – 20 mM Tris-Acetate, 100 mM Na Acetate, 10 mM MgAcetate<sub>2</sub>, 10 mM CaCl<sub>2</sub>, pH 8.4; 2 – 20 mM Tris-Acetate, 100 mM NaAcetate, pH 8.4; 3 – 20 mM Tris-Acetate, 20 mM MgAcetate<sub>2</sub>, pH 8.4; 4 – 20 mM Tris-Acetate, 100 mM NaAcetate, 20 mM MgAcetate<sub>2</sub>, pH 8.4 (n=3)

**Table S1. The comparison of dissociation constants of the anti-AFB1 loop-stem aptamer in different buffer compositions**

| # | Buffer composition                                                                                    | K <sub>D</sub> (nM) |
|---|-------------------------------------------------------------------------------------------------------|---------------------|
| 1 | 20 mM Tris-Acetate, 100 mM NaAcetate, 10 mM MgAcetate <sub>2</sub> , 10 mM CaCl <sub>2</sub> , pH 8.4 | 145.0±5.3           |
| 2 | 20 mM Tris-Acetate, 100 mM NaAcetate, pH 8.4                                                          | 30500±4200*         |
| 3 | 20 mM Tris-Acetate, 20 mM MgAcetate <sub>2</sub> , pH 8.4                                             | 190±28.1            |
| 4 | 20 mM Tris-Acetate, 100 mM NaAcetate, 20 mM MgAcetate <sub>2</sub> , pH 8.4                           | 173.1±9.5           |

\*the K<sub>D</sub> value was estimated with an assumption that maxFA is the same as for the buffer#1 composition

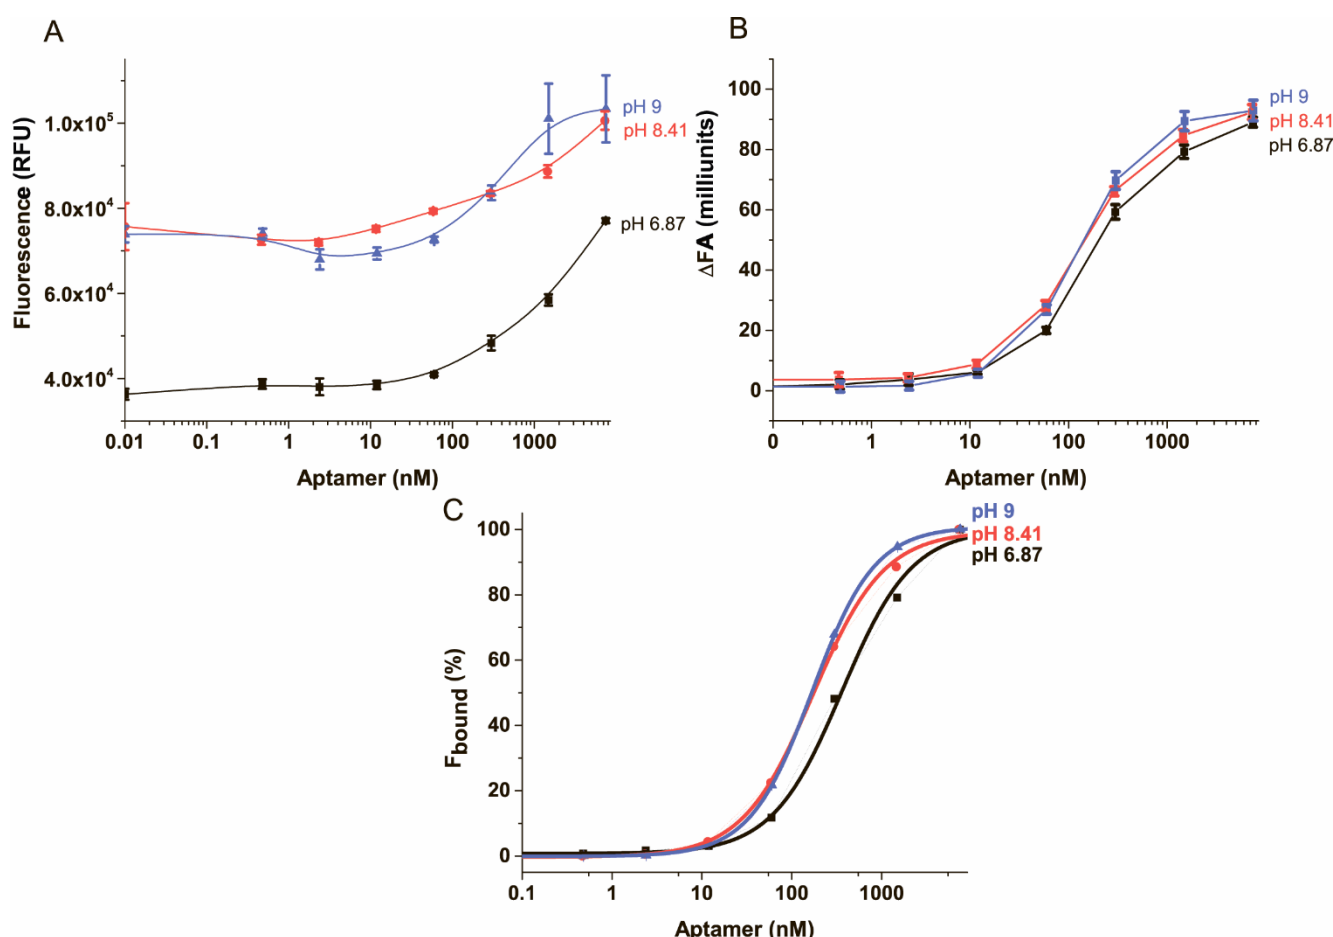

**Figure S2.** The dependencies of fluorescence (A), fluorescence anisotropy (B), and the percentage of bound fraction (C) of AFB1-EDF on the concentration of initial aptamer at different pH (n=3)

**Table S2. The comparison of dissociation constants of the initial anti-AFB1 loop-stem aptamer at different pH**

| pH     | Buffer composition                                                 | K <sub>D</sub> (nM) |
|--------|--------------------------------------------------------------------|---------------------|
| pH 6.8 | 20 mM Tris-Acetate, 100 mM NaAcetate, 20 mM MgAcetate <sub>2</sub> | 362.5±33.5          |
| pH 8.4 |                                                                    | 173.1±9.5           |
| pH 9   |                                                                    | 168.8±1.1           |

### Synthesis of the aptamer-protein complexes

500 μL of 4 μM prepared 5'-biotinylated aptamer 38nt in TB was mixed with 500 μL of 4 or 8 μM streptavidin in TB. Then the obtained stock solutions were incubated for 1 h at room temperature with gentle stirring. After the series of consecutive 5-fold dilutions were prepared and mixed with an equal volume of AFB1-EDF (a final concentration of 5 nM). Each well contains 100μL of solution.

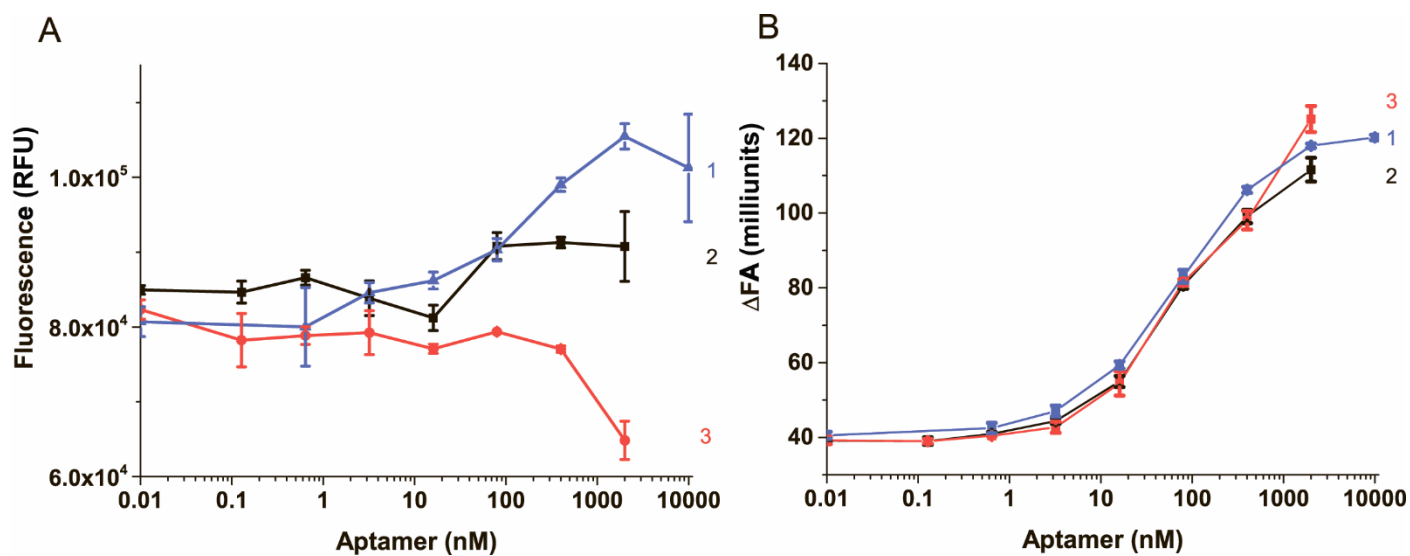

**Figure S3.** The dependencies of fluorescence (A) and change of fluorescence anisotropy (B) of AFB1-EDF in the presence of aptamer 38nt (1) and its conjugates with streptavidin at ratio 2:1 (2) and 1:2 (3). (n=3)
